# Supplementary material
Source: PubMed Central journal article supplement (PMC4640317)
Supplement: jcbfm201586x1.pdf [file jcbfm201586x1.pdf]

**Supplementary Table 1.** Skilled reaching ability (mean  $\pm$  SD)

| <b>Injection</b> | <b>Treatment</b> | <b>N</b> | <b>Baseline</b> | <b>7 days</b> | <b>14 days</b> | <b>21 days</b> |
|------------------|------------------|----------|-----------------|---------------|----------------|----------------|
| PBS              | L-655,708        | 7        | 100 $\pm$ 10    | 101 $\pm$ 13  | 105 $\pm$ 10   | 107 $\pm$ 11   |
| ET-1             | L-655,708        | 11       | 100 $\pm$ 15    | 37 $\pm$ 27   | 51 $\pm$ 32    | 62 $\pm$ 31    |
| ET-1             | Placebo          | 9        | 100 $\pm$ 13    | 31 $\pm$ 24   | 28 $\pm$ 25    | 37 $\pm$ 25    |

**Supplementary Table 2.** Animal body weight

| <b>Group</b>     |                  |          | <b>Starting weight (on day -6)</b> |            |           | <b>Growth after injection (day 0-21)</b> |                |
|------------------|------------------|----------|------------------------------------|------------|-----------|------------------------------------------|----------------|
| <b>Injection</b> | <b>Treatment</b> | <b>N</b> | <b>Mean</b>                        | <b>SEM</b> | <b>SD</b> | <b>[g /week]</b>                         | <b>p-value</b> |
| PBS              | L-655,708        | 7        | 325                                | 7          | 18        | 9.8 $\pm$ 0.2                            | < 0.0001       |
| ET-1             | L-655,708        | 5        | 336                                | 21         | 47        | 11.8 $\pm$ 0.2                           | < 0.0001       |
| ET-1             | Placebo          | 6        | 357                                | 12         | 29        | 2.8 $\pm$ 0.2                            | 0.1            |

The mean animal weights at the start of baseline skilled reaching ability evaluation (6 days before ET-1 or PBS injection) are listed in columns 4-7. Post-surgery rate of change (mean  $\pm$  SEM) in animal weight from day 0 to day 21 is shown in column 7, with the p-value on this slope quoted in column 8.

## Supplementary Figure 1. Animal body weight

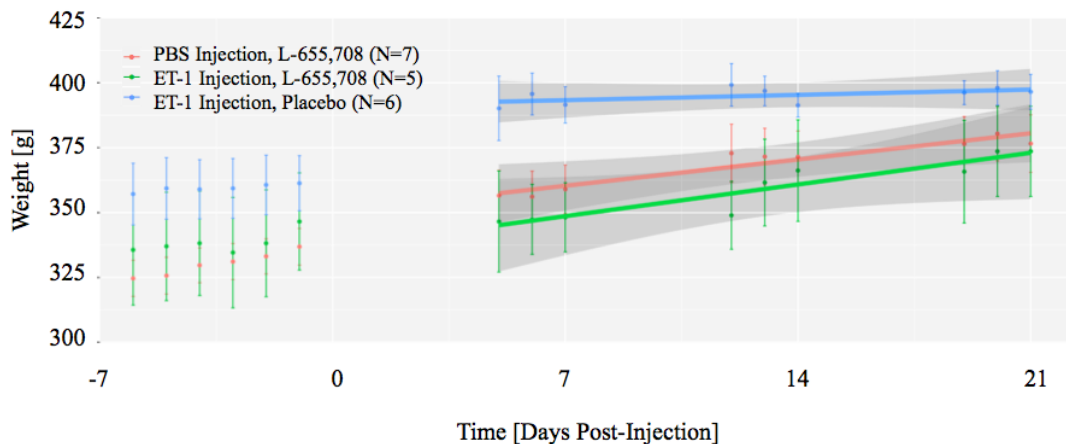

Body weights (N=18) of PBS injected and treated with L-655,708 (red); ET-1 injected and treated with L-655,708 (green); ET-1 injected and given a placebo (blue). Weight was measured daily during the behavioural training and testing periods, namely: prior to stroke induction (training) on days -6 through -1; prior to treatment on days 4-6 after surgery; after one week of L-655,708 treatment or placebo administration on days 11-13; and after two weeks of L-655,708 treatment or placebo administration on days 18-20. Body weight in grams is shown as mean  $\pm$  SEM. There was no dependence of starting weight (Supplementary Table 2.) on group ( $p=0.2$ ). Comparing starting weight between groups: there was neither a difference between L-655,708 treated groups nor between ET-1 injected groups ( $p=0.6$  and  $0.4$  respectively), however, there was a difference between the placebo and PBS injected groups ( $p=0.03$ ), with the mean weight of the former being greater. The slope of weight after ET-1 or PBS injection, was positive in L-655,708 treated groups (ET-1:  $11.8 \pm 0.2$  g/week, and PBS:  $9.8 \pm 0.2$  g/week,  $p$ -values  $<0.00001$ ), while the placebo group showed a trend ( $2.8 \pm 0.2$  g/week,  $p=0.1$ ). The rate of increase in weight of the placebo group was different from both L-655,708 treated groups after injection ( $p$ -values  $< 0.00001$ ), while there was no difference between L-655,708 treated groups ( $p=0.2$ ). After ET-1 or PBS injection (but before treatment) there was a difference in weight between the placebo group and both L-655,708 treated groups ( $p$ -values= $0.02$ ), but no difference between L-

655,708 treated groups ( $p=0.6$ ). After the first week of treatment, the weight of the placebo group was different from the ET-1 injected L-655,708 treated group ( $p=0.05$ ), and showed a trend towards being different from the placebo group ( $p=0.09$ ), with still no difference between L-655,708 treated groups ( $p=0.5$ ). At the final time point (after two weeks of treatment), there were no differences in weight between groups ( $p\text{-values} > 0.2$ ).

**Supplementary Figure 2.** T<sub>2</sub>-weighted MRI in sham stroke with L-655,708 treatment

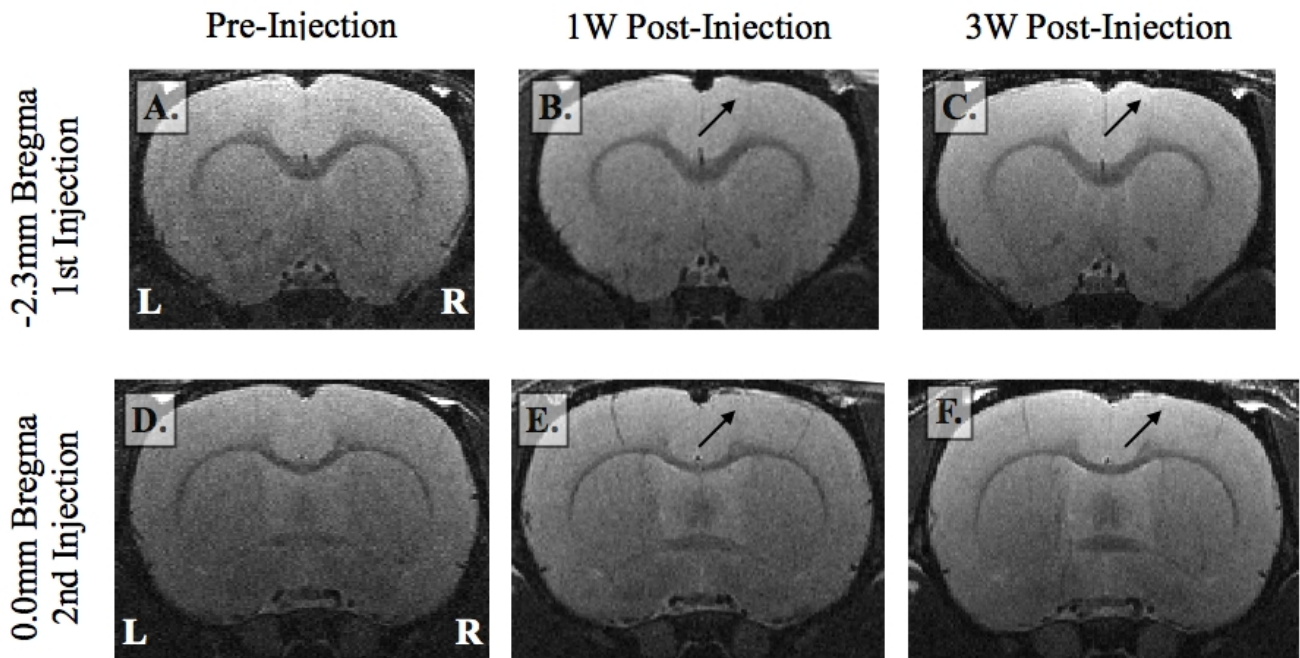

Six images collected from a representative animal prior to (**A** and **D**), 7 days (**B** and **E**), and 21 days (**C** and **F**) after sham stroke induction (intra-cortical injection of PBS). Seven days after sham surgery this animal was treated with L-655,708 for 14 days (i.e. until the study end point 21 days after sham stroke induction). The first row of images (**A**, **B**, and **C**) were collected at the level of the anterior injection site (-2.3mm Bregma), and the second row of images (**D**, **E**, and **F**) were collected at the level of the posterior injection site (0.0mm Bregma). The black arrows (in **B**, **C**, **E**, and **F**) indicate the site of PBS injection. Minimal signal contrast along the needle tract was observed following PBS injection (in **B**, **C**, **E**, and **F**). No change in image contrast was observed between 7 and 21 days (before and after L-655,708 treatment).

**Supplementary Figure 3. GFAP and NeuN Immunohistochemistry**

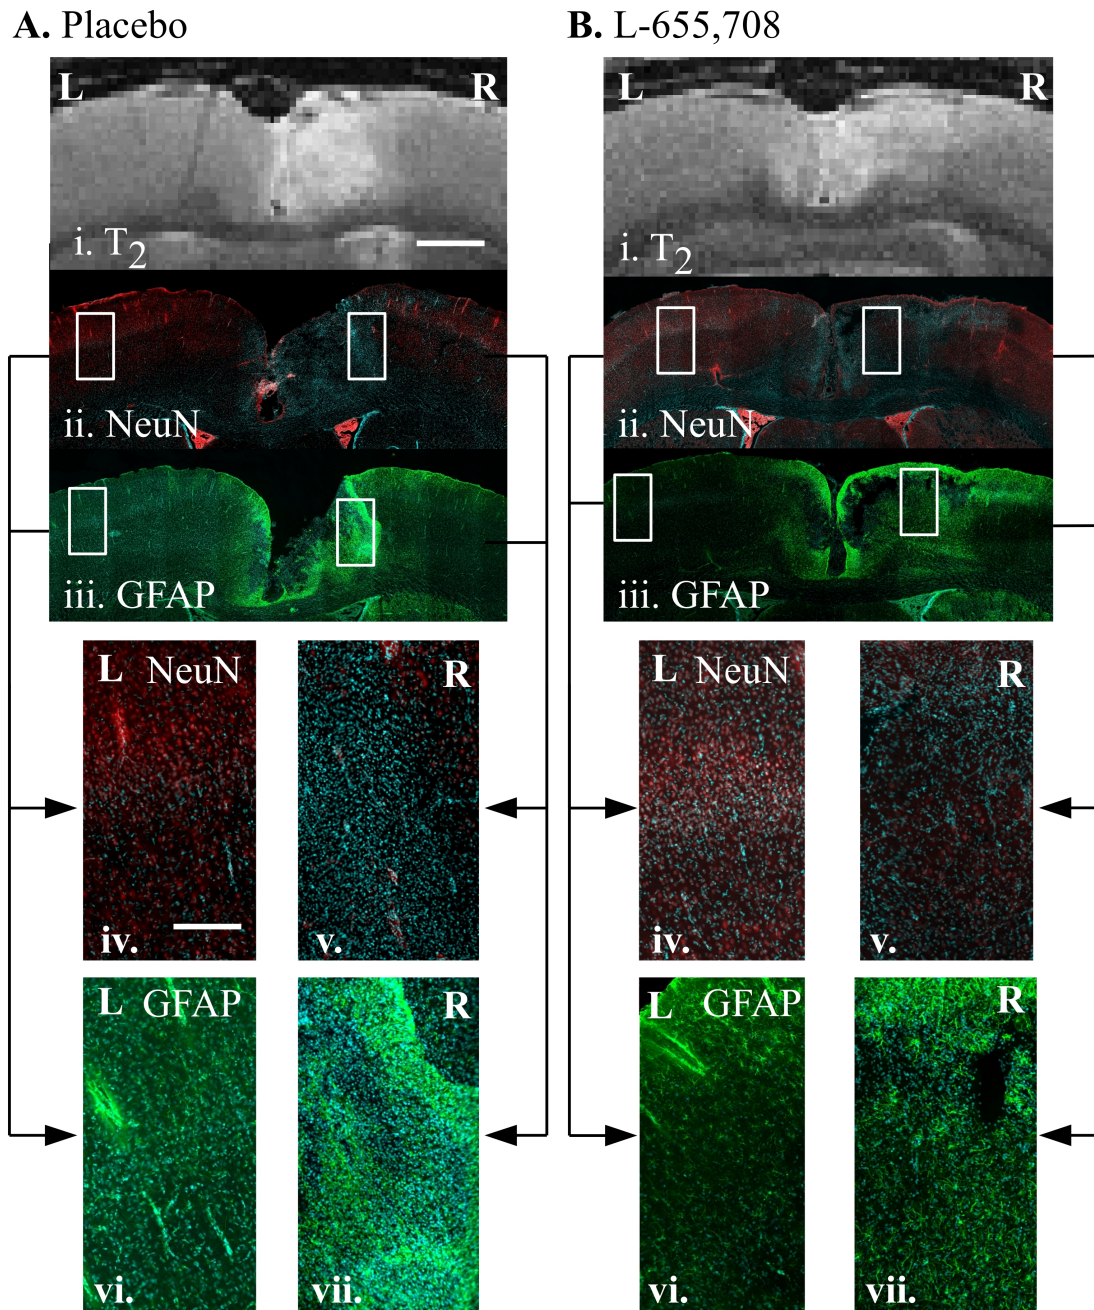

Immunohistochemical results for the regions of interest in two animals with ET-1 induced injury and corresponding T<sub>2</sub>-weighted MR images (**Ai** and **Bi**). (**A**) was administered a placebo and (**B**) was treated with L-655,708; both were sacrificed three weeks after stroke (i.e. after two weeks of treatment). In **A/Bi** the T<sub>2</sub>-weighted cortical regions of interest (~0.0 Bregma) are shown for both

animals (scale bar 1mm). The immunohistological sections corresponding to the same ROI as **A/Bi** are shown in **A/Bii** (NeuN - red, DAPI - blue) and **A/Biii** (GFAP - green, DAPI - blue) [scale same as **A/Bi**]. Surrounding the necrotic core, devoid of NeuN or GFAP positive cells, is the peri-lesional zone characterized by low neuronal density (NeuN, red), and astrogliosis (GFAP, green). Within **A/Bii** and **A/Biii** six smaller regions of interest are indicated corresponding to images **A/Biv** (NeuN - left hemisphere), **A/Bv** (NeuN - right hemisphere), **A/Bvi** (GFAP - left hemisphere), and **A/Bvii** (GFAP - right hemisphere) [scale shown in **Aiv** 300µm, equivalent for **A/Biv-vii**].
